# Supplementary material for: Computer simulations explain the anomalous temperature optimum in a cold-adapted enzyme
Source: PubMed Central journal article supplement (PMC7250929; doi:10.1038/s41467-020-16341-2), 2020-05-26
Supplement: 41467_2020_16341_MOESM3_ESM.pdf [file 41467_2020_16341_MOESM3_ESM.pdf]

### **Description of Additional Supplementary Files**

File name: Supplementary Data 1

Description: Our former Supplementary Table 1 containing coordinates and energies of optimized structures.
